# Supplementary material for: Fabrication of Highly Conductive Porous Cellulose/PEDOT:PSS Nanocomposite Paper via Post-Treatment
Source: MDPI journal article supplement (doi:10.3390/nano9040612), 2019-04-13
Supplement: s1 [file s1]

# Supporting Information: Fabrication of Highly Conductive Porous Cellulose/PEDOT:PSS Nanocomposite Paper via Post-Treatment

**Yongsang Ko<sup>1</sup>, Jeonghun Kim<sup>\*2</sup>, Dabum Kim<sup>1</sup>, Goomin Kwon<sup>1</sup>, Yusuke Yamauchi<sup>2</sup> and Jungmok You<sup>\*1</sup>**  
<sup>1</sup> Department of Plant & Environmental New Resources, Kyung Hee University, 1732 Deogyong-daero, Giheung-gu, Yongin-si, Gyeonggi-do 446-701, South Korea.  
<sup>2</sup> School of Chemical Engineering & Australian Institute for Bioengineering and Nanotechnology (AIBN), The University of Queensland, QLD 4072, Australia.  
<sup>\*</sup> Correspondence: jeonghun.kim@uq.edu.au; jmyou@khu.ac.kr

**Table 1.** Sheet resistance, thickness, and electrical conductivity of PEDOT:PSS/cellulose-nanofiber composite paper with or without the solvent post-treatment.

| Treatment agent | Sheet resistance ( $\Omega/\text{sq}$ ) | Thickness ( $\mu\text{m}$ ) | Conductivity ( $\text{S/cm}$ ) |
|-----------------|-----------------------------------------|-----------------------------|--------------------------------|
| Pristine        | $418.73 \pm 48.94$                      | 23                          | $1.05 \pm 0.12$                |
| DMSO            | $5.41 \pm 0.26$                         | 15                          | $123.37 \pm 5.87$              |
| EG              | $6.49 \pm 1.49$                         | 15                          | $106.6 \pm 25.16$              |

<sup>\*</sup>DMSO- Dimethyl sulfoxide

<sup>\*</sup>EG- Ethylene glycol

**Table S2.** A comparison of conductive polymer/cellulose nanocomposites

| Serial # | Sample              | Method                 | Conductance ( $\text{S/cm}$ ) | References   |
|----------|---------------------|------------------------|-------------------------------|--------------|
| 1        | PANi/BC             | In-situ polymerization | $1.4 \times 10^{-1}$          | 45           |
| 2        | PPy/BC              | In-situ polymerization | 3.39                          | 46           |
| 3        | PPy/CNF             | Vacuum filtration      | 13.45                         | 39           |
| 4        | PPy/PEDOT:PSS/CNF   | Vacuum filtration      | 10.55                         | 39           |
| 5        | PEDOT:PSS/BC        | Ex-situ incorporation  | 12.17                         | 47           |
| 6        | PEDOT:PSS/Cellulose | In-situ polymerization | 30                            | 48           |
| 7        | PEDOT:PSS/CNF       | Vacuum filtration      | 2.58                          | 39           |
| 8        | PEDOT:PSS/CNF       | Vacuum filtration      | 22.6                          | 19           |
| 9        | PEDOT:PSS/CNF       | Drop-casting           | 45                            | 40           |
| 10       | PEDOT:PSS/CNF       | Vacuum filtration      | 123.4                         | Present work |

<sup>\*</sup>BC- Bacterial cellulose

<sup>\*</sup>PANi- Polyaniline

<sup>\*</sup>PPy- Polypyrrole

<sup>\*</sup>CNF- Cellulose nanofiber

<sup>\*</sup>PEDOT:PSS- Poly(3,4-ethylenedioxythiophene) polystyrene sulfonate

**Table S3.** Sheet resistance according to the number of times DMSO filtering was conducted on the PEDOT:PSS/cellulose-nanofiber composite paper.

| Number | Sheet resistance ( $\Omega/\text{sq}$ ) |
|--------|-----------------------------------------|
| 1      | $5.41 \pm 0.26$                         |
| 2      | $5.25 \pm 0.12$                         |
| 3      | $5.09 \pm 0.12$                         |

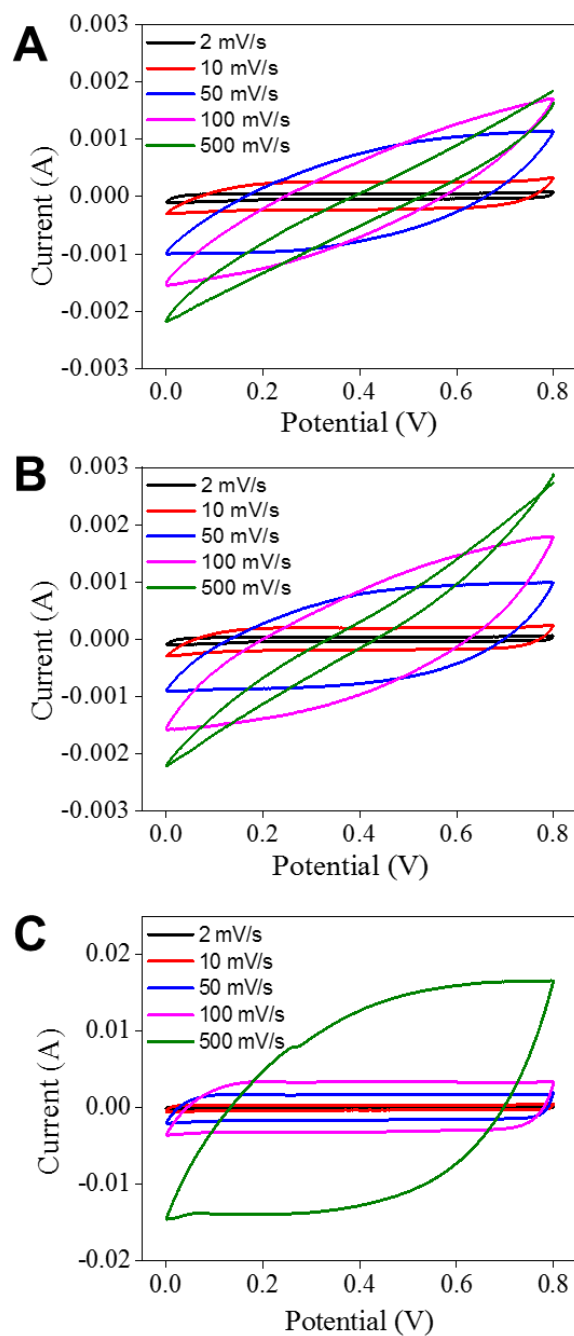

**Figure S1.** (A–C) Cyclic voltammetry (CV) of PEDOT:PSS/cellulose–nanofiber composite papers. (A) Pristine, (B) DMSO, and (C) EG.
